# Supplementary material
Source: ML conference proceedings conference paper supplement (https://openreview.net/forum?id=Vqtf4kZg2j)

Sweep over  $\beta_4$

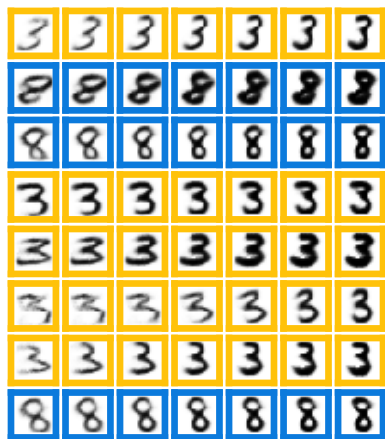

-3.0 -2.0 -1.0 +0.0 +1.0 +2.0 +3.0

Supplement: supplementary_material [file attachment]

Sweep over  $\beta_1$

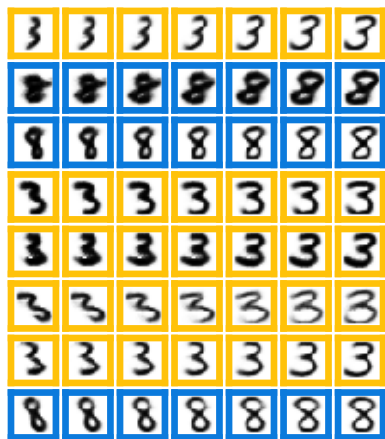

-3.0 -2.0 -1.0 +0.0 +1.0 +2.0 +3.0

Supplement: supplementary_material [file attachment]

# Latent sweeps for class 3

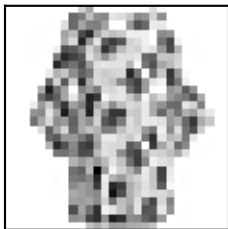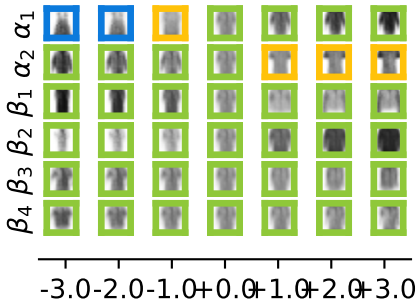

Supplement: supplementary_material [file attachment]

Sweep over  $\alpha_1$

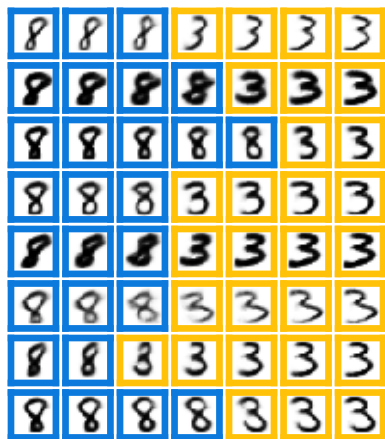

-3.0 -2.0 -1.0 +0.0 +1.0 +2.0 +3.0

Supplement: supplementary_material [file attachment]

Sweep over  $\alpha_1$ 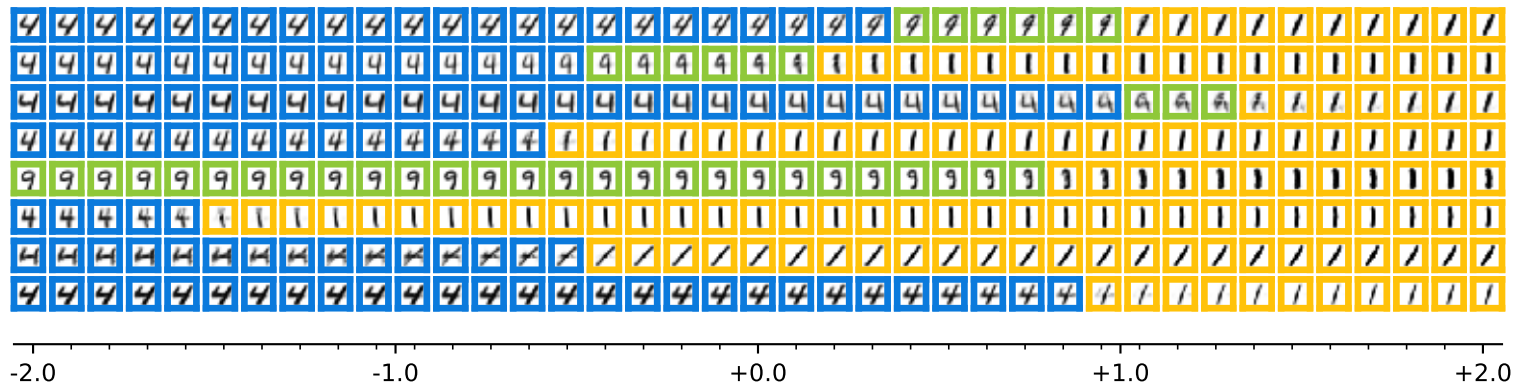

Supplement: supplementary_material [file attachment]

Information flow of individual causal factors

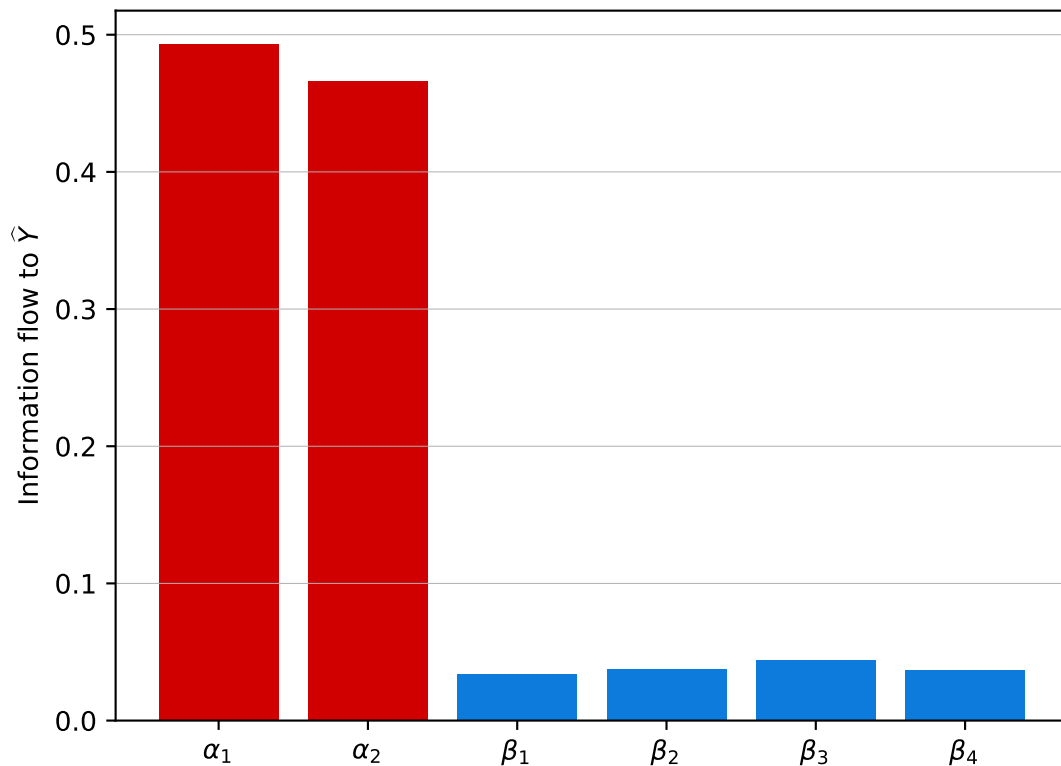

Supplement: supplementary_material [file attachment]

Information flow of individual causal factors

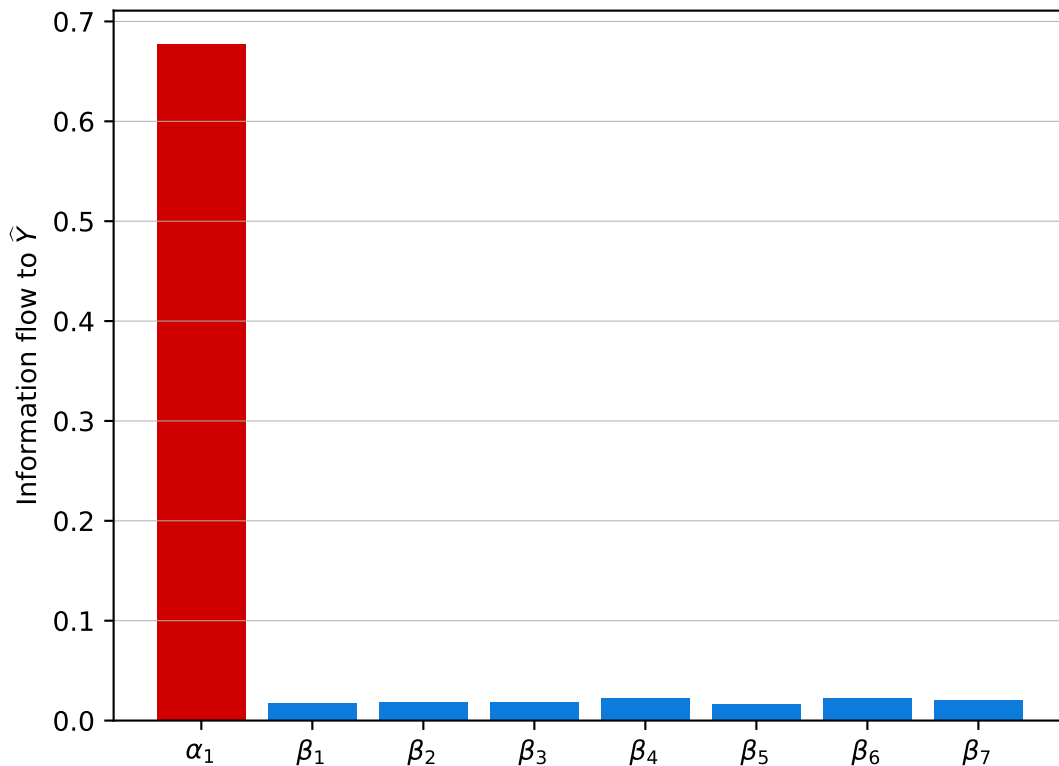

Supplement: supplementary_material [file attachment]

Sweep over  $\alpha_1$

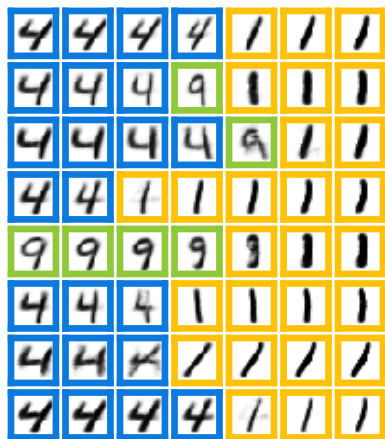

-3.0 -2.0 -1.0 +0.0 +1.0 +2.0 +3.0

Supplement: supplementary_material [file attachment]

# Latent sweeps for class 4

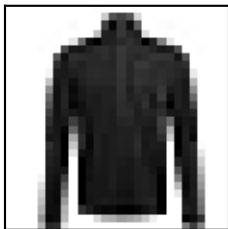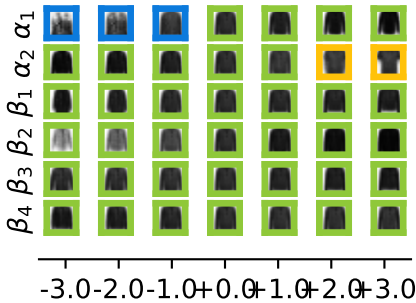

Supplement: supplementary_material [file attachment]

Sweep over  $\beta_7$

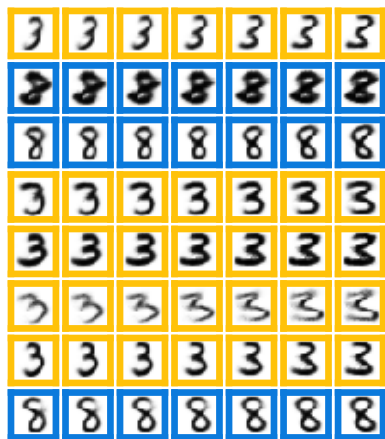

-3.0 -2.0 -1.0 +0.0 +1.0 +2.0 +3.0

Supplement: supplementary_material [file attachment]

Sweep over  $\beta_2$

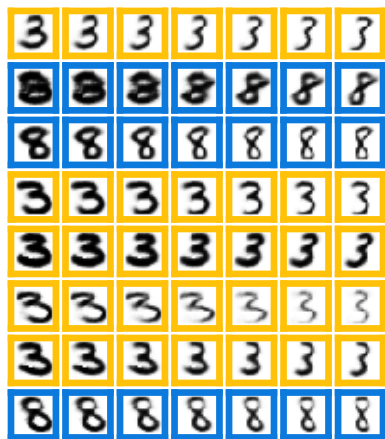

-3.0 -2.0 -1.0 +0.0 +1.0 +2.0 +3.0

Supplement: supplementary_material [file attachment]

# Latent sweeps for class 9

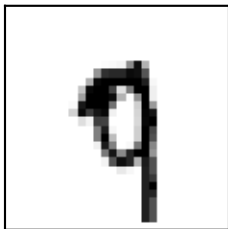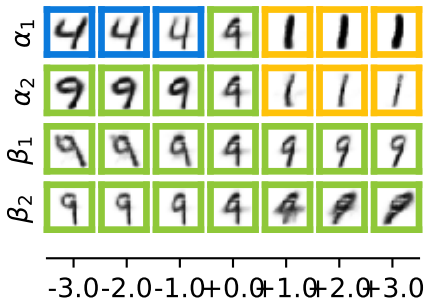

Supplement: supplementary_material [file attachment]

Sweep over  $\beta_2$

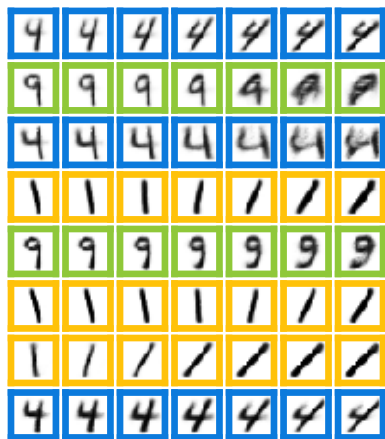

-3.0 -2.0 -1.0 +0.0 +1.0 +2.0 +3.0

Supplement: supplementary_material [file attachment]

Information flow of individual causal factors

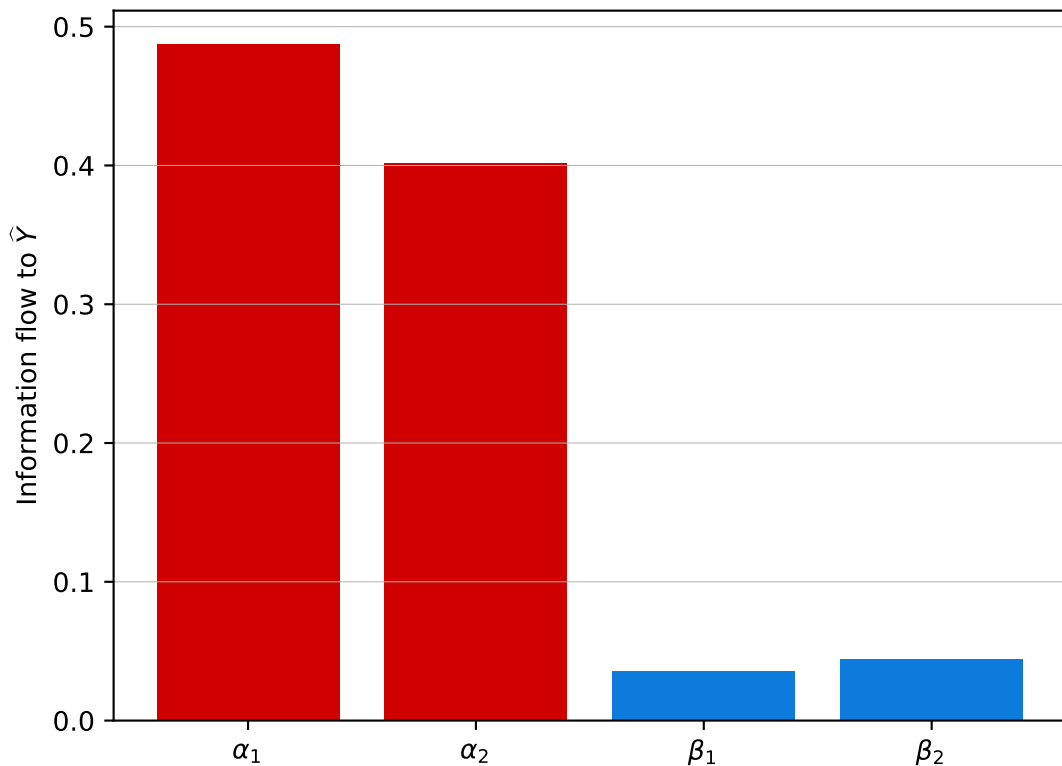

Supplement: supplementary_material [file attachment]

Sweep over  $\alpha_2$

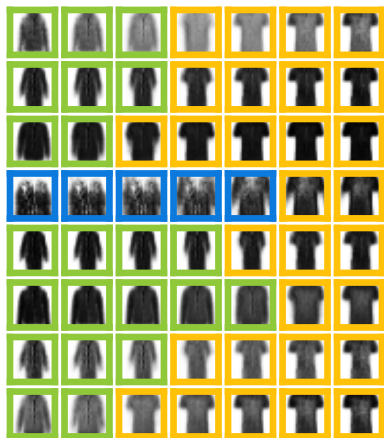

-3.0 -2.0 -1.0 +0.0 +1.0 +2.0 +3.0

Supplement: supplementary_material [file attachment]

Sweep over  $\beta_2$

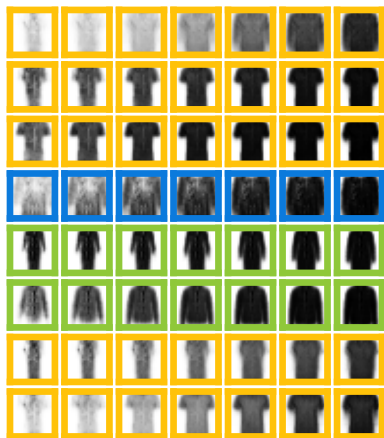

-3.0 -2.0 -1.0 +0.0 +1.0 +2.0 +3.0

Supplement: supplementary_material [file attachment]

Classifier accuracy after removing aspect

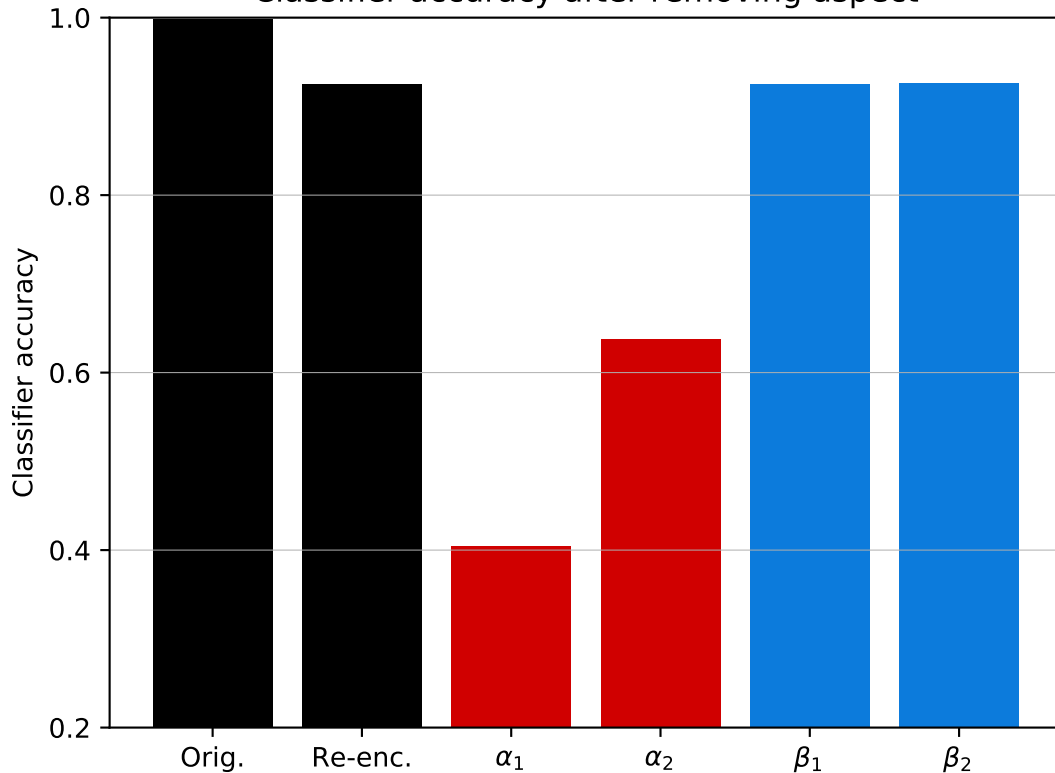

Supplement: supplementary_material [file attachment]

Sweep over  $\beta_3$

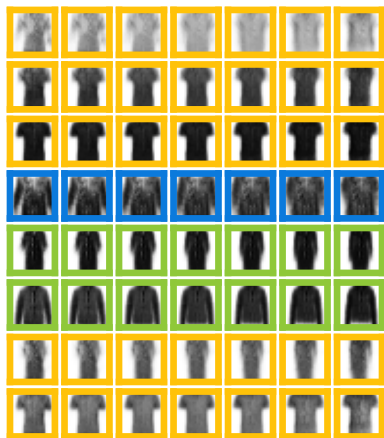

-3.0 -2.0 -1.0 +0.0 +1.0 +2.0 +3.0

Supplement: supplementary_material [file attachment]

Sweep over  $\beta_6$

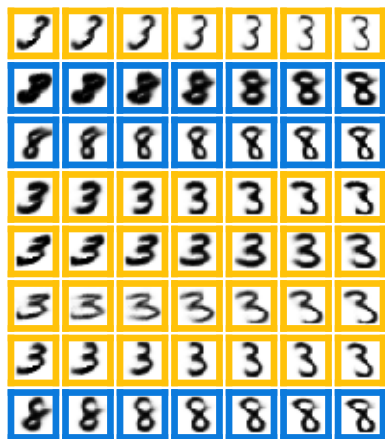

-3.0 -2.0 -1.0 +0.0 +1.0 +2.0 +3.0

Supplement: supplementary_material [file attachment]

# Latent sweeps for class 4

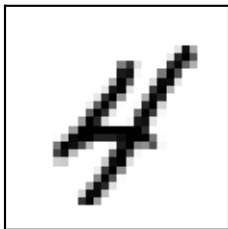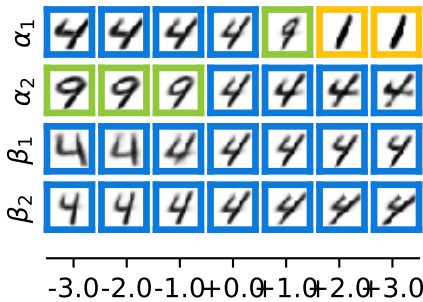

Supplement: supplementary_material [file attachment]

Sweep over  $\alpha_2$

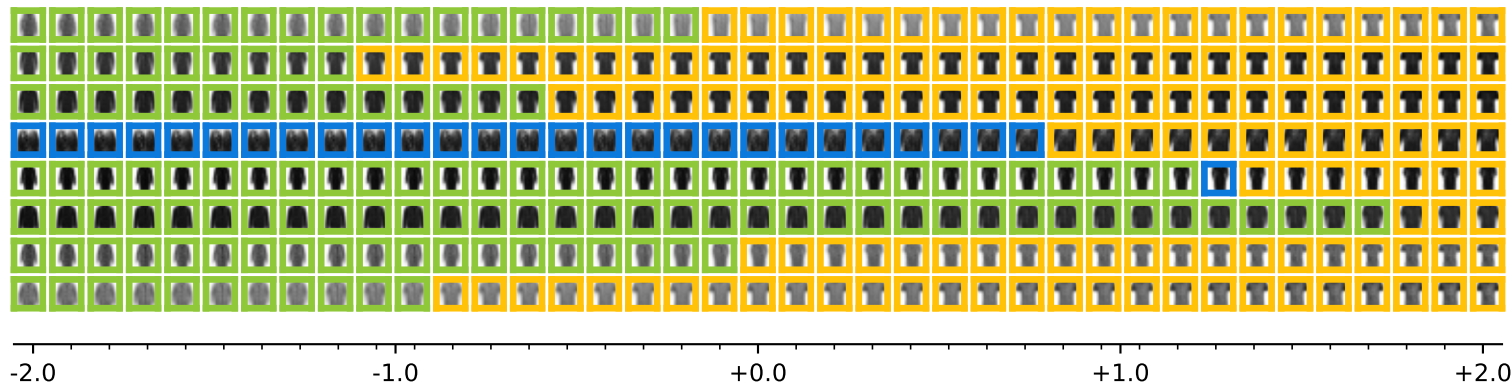

Supplement: supplementary_material [file attachment]

Sweep over  $\beta_1$

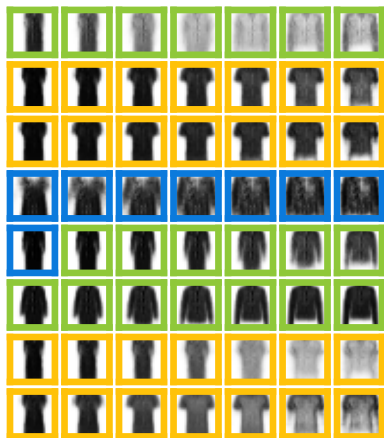

-3.0 -2.0 -1.0 +0.0 +1.0 +2.0 +3.0

Supplement: supplementary_material [file attachment]

Sweep over  $\alpha_2$

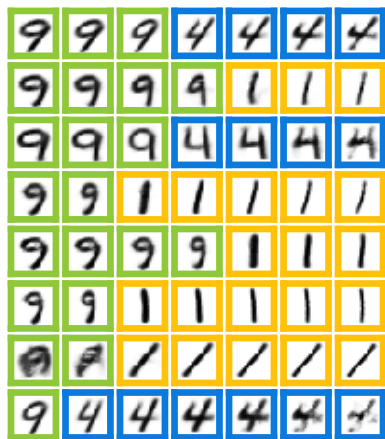

-3.0 -2.0 -1.0 +0.0 +1.0 +2.0 +3.0

Supplement: supplementary_material [file attachment]

Sweep over  $\beta_1$

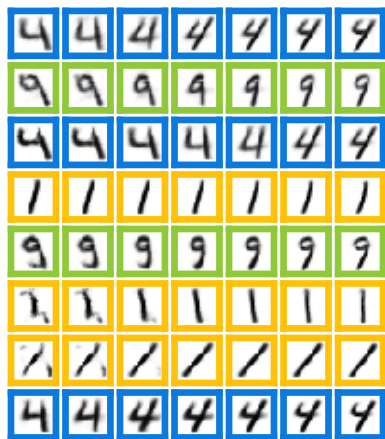

-3.0 -2.0 -1.0 +0.0 +1.0 +2.0 +3.0

Supplement: supplementary_material [file attachment]

Sweep over  $\alpha_2$ 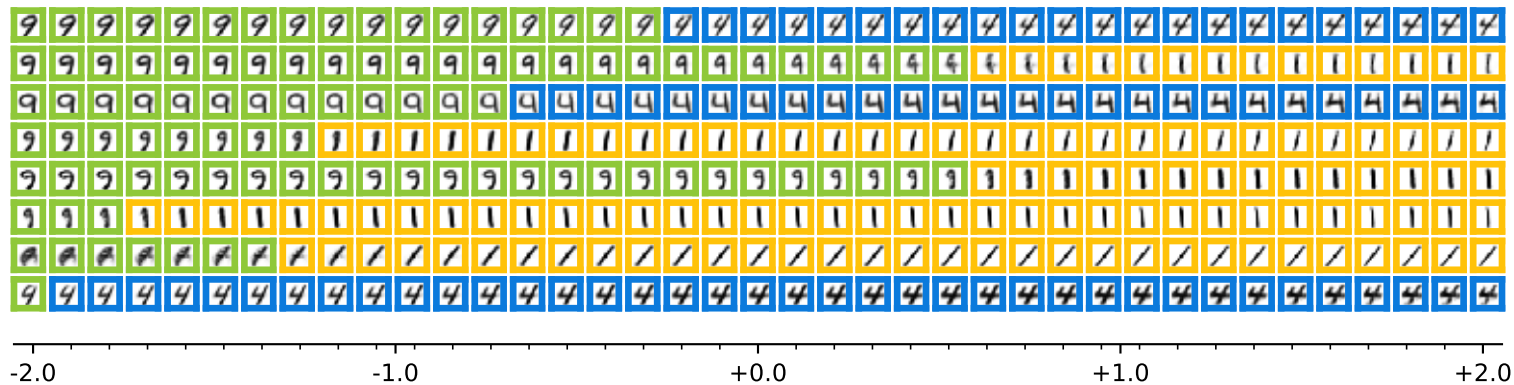

Supplement: supplementary_material [file attachment]

Sweep over  $\alpha_1$

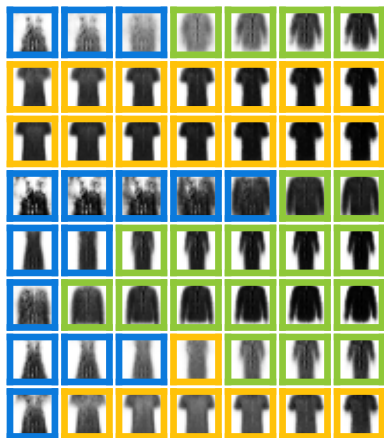

-3.0 -2.0 -1.0 +0.0 +1.0 +2.0 +3.0

Supplement: supplementary_material [file attachment]

Classifier accuracy after removing aspect

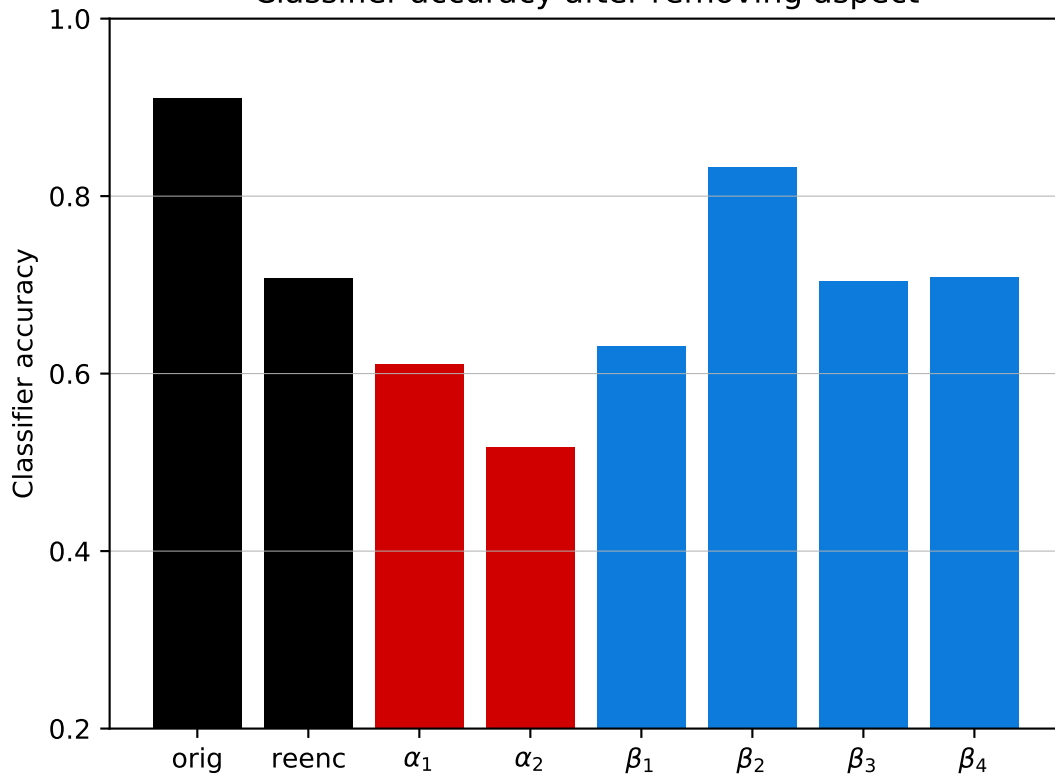

Supplement: supplementary_material [file attachment]

Sweep over  $\beta_4$

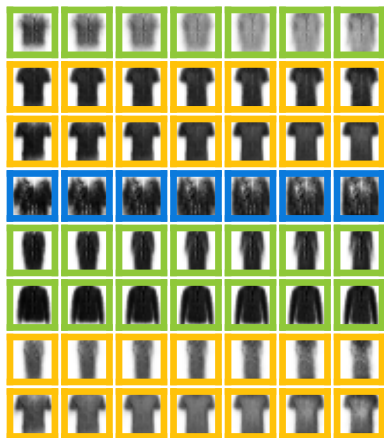

-3.0 -2.0 -1.0 +0.0 +1.0 +2.0 +3.0

Supplement: supplementary_material [file attachment]

Sweep over  $\alpha_1$

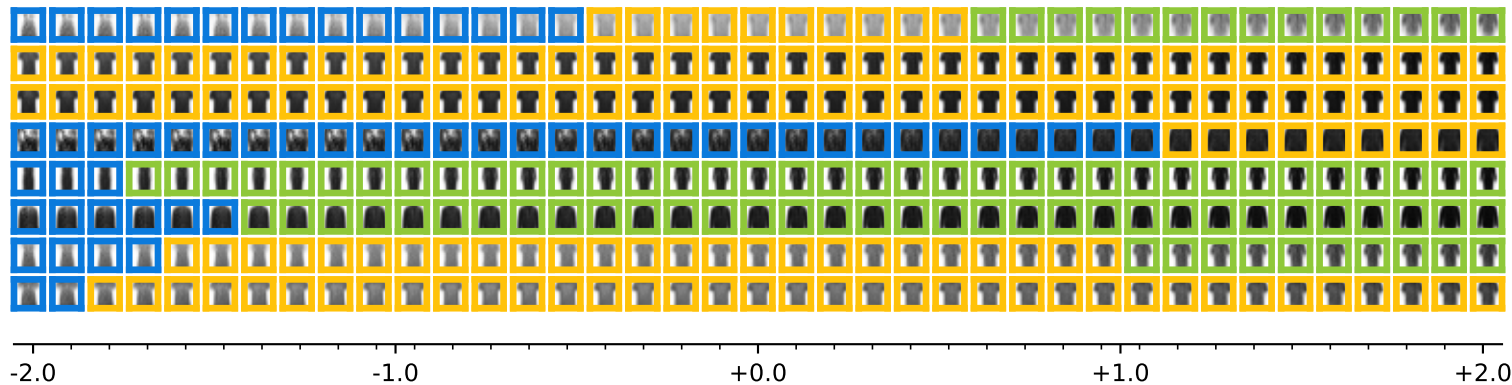

Supplement: supplementary_material [file attachment]

Sweep over  $\beta_3$

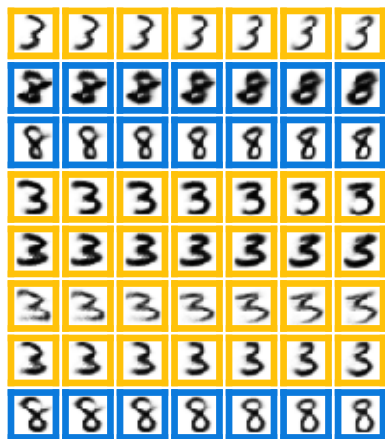

-3.0 -2.0 -1.0 +0.0 +1.0 +2.0 +3.0

Supplement: supplementary_material [file attachment]

Sweep over  $\beta_5$

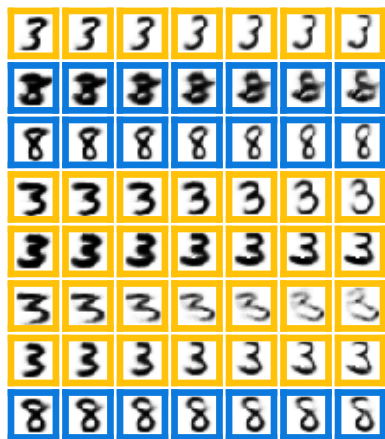

-3.0 -2.0 -1.0 +0.0 +1.0 +2.0 +3.0

Supplement: supplementary_material [file attachment]

Classifier accuracy after removing aspect

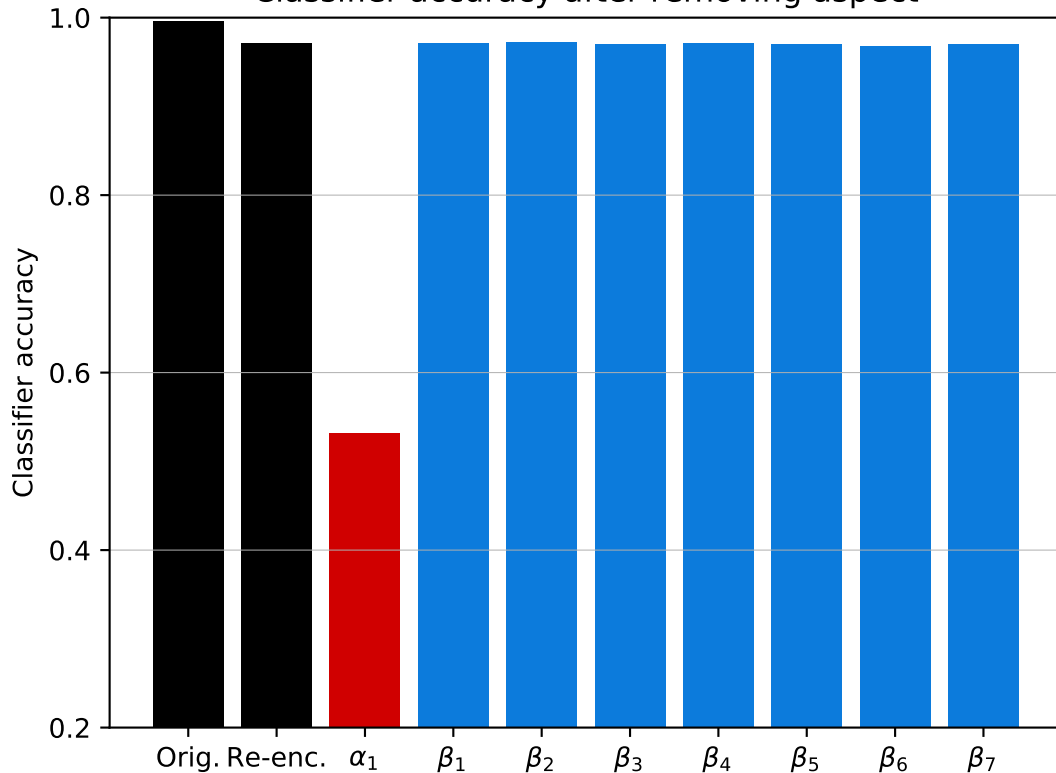

Supplement: supplementary_material [file attachment]
